# Supplementary material
Source: PubMed Central journal article supplement (PMC7124918)
Supplement: tpmd190481.SD1.pdf [file tpmd190481.SD1.pdf]

Supplemental Table 1: Details of the samples used for mutational analysis

| Name    | Accession Numbers | Viral load | VAS | IgM | Neutralization | Days post onset of fever | Year of collection |
|---------|-------------------|------------|-----|-----|----------------|--------------------------|--------------------|
| 2010_01 | MH124570          | 3.87E+09   | 9   | -ve | -ve            | 2                        | 2010               |
| 2010_03 | MH124571          | 3.67E+08   | 4   | -ve | -ve            | 5                        | 2010               |
| 2010_05 | MH124572          | 3.96E+08   | 8   | -ve | -ve            | 3                        | 2010               |
| 2010_06 | MH124573          | 3.95E+09   | 4   | -ve | -ve            | 4                        | 2010               |
| 2010_10 | MH124574          | 4.20E+07   | 8   | -ve | ND             | 2                        | 2010               |
| 2010_13 | MH124575          | 3.82E+08   | 7   | +ve | -ve            | 3                        | 2010               |
| 2010_14 | MH124576          | 3.70E+08   | 8   | +ve | -ve            | 4                        | 2010               |
| 2010_20 | MH124577          | 7.19E+08   | 7   | +ve | -ve            | 5                        | 2010               |
| 2010_11 | MH124578          | 3.70E+09   | 9   | +ve | -ve            | 5                        | 2010               |
| 2010_12 | MH124579          | 3.75E+08   | 6   | -ve | -ve            | 5                        | 2010               |
| 2016_01 | MH124580          | 5.21E+06   | 6   | -ve | -ve            | 2                        | 2016               |
| 2016_02 | MH124581          | 5.41E+06   | 3   | -ve | +ve            | 2                        | 2016               |
| 2016_03 | MH124582          | 6.21E+06   | 0   | +ve | -ve            | 4                        | 2016               |
| 2016_11 | MH124583          | 6.51E+06   | 0   | +ve | +ve            | 3                        | 2016               |
| 2016_07 | Not uploaded      | 1.06E+07   | 0   | -ve | -ve            | 2                        | 2016               |
| 2016_09 | Not uploaded      | 1.62E+07   | 0   | +ve | +ve            | 5                        | 2016               |
| 2016_05 | Not uploaded      | 4.51E+06   | 3   | +ve | +ve            | 5                        | 2016               |
| 2016_10 | Not uploaded      | 4.87E+06   | 6   | -ve | -ve            | 3                        | 2016               |
| 2016_04 | Not uploaded      | 8.611E+07  | 2   | -ve | -ve            | 2                        | 2016               |
| 2016_06 | Not uploaded      | 7.06E+07   | 0   | +ve | +ve            | 4                        | 2016               |
| 2010_88 | Not uploaded      | 8.43E+07   | 6   | -ve | -ve            | 3                        | 2010               |
